# Supplementary material for: Airflows generated by an impacting drop
Source: Royal Society of Chemistry journal article supplement (doi:10.1039/c5sm02702k), 2016-01-01
Supplement: c5sm02702k1.pdf [file c5sm02702k1.pdf]

## Electronic Supplementary Information

### Airflows generated by an impacting drop

Irmgard Bischofberger<sup>a,\*</sup>, Bahni Ray<sup>b</sup>, Jeffrey F. Morris<sup>c,d</sup>, Taehun Lee<sup>b</sup> and Sidney R. Nagel<sup>a</sup>

The Electronic Supplementary Information consists of two movies showing the airflows generated by a liquid drop impacting a dry substrate.

Movie 1:

Impact of a 1.25 mm radius water-ethanol drop at  $Re_{air} = 612$  on a smooth substrate. The liquid viscosity is  $\nu_{liq} = 2.4 \text{ mm}^2/\text{s}$ , the impact velocity is  $u_0 = 3.8 \text{ m/s}$  and the pressure is  $P = 101 \text{ kPa}$ .

Movie 2:

Impact of a 1.4 mm radius silicone oil drop at  $Re_{air} = 685$  on a rough substrate with root-mean-square roughness  $R_{rms} \approx 1 \text{ }\mu\text{m}$ . The liquid viscosity is  $\nu_{liq} = 20 \text{ mm}^2/\text{s}$ , the impact velocity is  $u_0 = 3.8 \text{ m/s}$  and the pressure is  $P = 101 \text{ kPa}$ .

---

<sup>a</sup> *The James Franck and Enrico Fermi Institutes and The Department of Physics, The University of Chicago, Chicago, Illinois 60637, USA;* <sup>b</sup> *Department of Mechanical Engineering, City College of City University of New York, New York, 10031, USA;* <sup>c</sup> *Department of Chemical Engineering, City College of City University of New York, New York, 10031, USA;* <sup>d</sup> *Benjamin Levich Institute, City College of New York, New York, NY 10031, USA. E-mail: irmgard.bischofberger@gmail.com*
